# Supplementary material
Source: HighWire-hosted journal article supplement (https://jnm.snmjournals.org/highwire/filestream/99054/field_highwire_adjunct_files/0/236083_Supplemental_Data.pdf)
Supplement: 236083_Supplemental_Data.pdf [file 236083_Supplemental_Data.pdf]

Supplemental Table 1. Treatment regimen at the time of scan 1 and scan 2\*

| Subject | Systemic therapy                                                     |
|---------|----------------------------------------------------------------------|
| 1       | Anti-androgen (bicalutamide), GnRH analog (leuprolide), denosumab    |
| 2       | Anti-androgen (bicalutamide), GnRH analog (triptorelin)              |
| 3       | Anti-androgen (enzalutamide), GnRH analog (leuprolide)               |
| 4       | Docetaxel, GnRH analog (leuprolide), denosumab                       |
| 5       | GnRH analog (triptorelin), zoledronate                               |
| 6       | GnRH analog (triptorelin), denosumab                                 |
| 7       | Anti-androgen (enzalutamide), GnRH analog (triptorelin), zoledronate |
| 8       | GnRH analog (triptorelin), denosumab                                 |
| 9       | Anti-androgen (enzalutamide), GnRH analog (leuprolide), denosumab    |
| 10      | GnRH analog (leuprolide), denosumab                                  |
| 11      | GnRH analog (leuprolide),                                            |
| 12      | GnRH analog (leuprolide), denosumab                                  |
| 13      | Anti-androgen (enzalutamide), GnRH analog (leuprolide), denosumab    |
| 14      | (bilateral orchiectomy)                                              |

- 15 Abiraterone, GnRH analog (leuprolide)
- 16 Anti-androgen (enzalutamide), GnRH analog (leuprolide), denosumab
- 17 GnRH analog (leuprolide)
- 18 GnRH analog (leuprolide)

---

\*GnRH, gonadotropin-releasing hormone

SUPPLEMENTAL TABLE 2. Repeatability between scanner type for SUV<sub>max</sub>\*†

| Organ or lesion      | Siemens mCT (n = 11 subjects) |         | Siemens Biograph Truepoint (n = 7 subjects) |         |          |
|----------------------|-------------------------------|---------|---------------------------------------------|---------|----------|
|                      | SUV <sub>max</sub>            |         | SUV <sub>max</sub>                          |         |          |
|                      | n                             | wCV (%) | n                                           | wCV (%) | <i>P</i> |
| Parotid glands       | 22                            | 9.7     | 14                                          | 9.3     | 0.64     |
| Submandibular glands | 22                            | 10.7    | 14                                          | 9.3     | 0.55     |
| Spleen               | 11                            | 10.9    | 7                                           | 7.1     | 0.52     |
| Bone lesions, total  | 51                            | 11.4    | 48                                          | 12.1    | 0.28     |
| Location             |                               |         |                                             |         |          |
| Extremity            | 12                            | 11.0    | 8                                           | 8.9     | 0.73     |
| Pelvic               | 12                            | 6.6     | 13                                          | 11.2    | 0.06     |
| Skull                | 6                             | 11.2    | 3                                           | 16.2    | 0.60     |
| Thoracic             | 11                            | 12.0    | 12                                          | 12.9    | 0.47     |
| Vertebrae            | 10                            | 14.3    | 12                                          | 10.3    | 0.66     |
| Nodal lesions        | 21                            | 10.9    | 6                                           | 9.3     | 0.85     |
| Prostate/bed         | 4                             | 12.0    | 3                                           | 5.6     | 0.21     |

\*SUV, standardized uptake value; wCV, within-subject coefficient of variation

†Visceral lesions were excluded from analysis due to their small number and only being present in the cohort imaged on the mCT.

SUPPLEMENTAL TABLE 3. Repeatability between scanner type for SUV<sub>mean</sub>\*†

| Organ or lesion      | Siemens mCT (n = 11 subjects) |         | Siemens Biograph Truepoint (n = 7 subjects) |         |          |
|----------------------|-------------------------------|---------|---------------------------------------------|---------|----------|
|                      | SUV <sub>mean</sub>           |         | SUV <sub>mean</sub>                         |         | <i>P</i> |
|                      | n                             | wCV (%) | n                                           | wCV (%) |          |
| Parotid glands       | 22                            | 9.4     | 14                                          | 9.3     | 0.97     |
| Submandibular glands | 22                            | 8.0     | 14                                          | 10.1    | 0.31     |
| Spleen               | 11                            | 12.1    | 7                                           | 6.1     | 0.35     |
| Bone lesions, total  | 51                            | 10.6    | 48                                          | 10.4    | 0.28     |
| Location             |                               |         |                                             |         |          |
| Extremity            | 12                            | 15.4    | 8                                           | 10.7    | 0.36     |
| Pelvic               | 12                            | 9.9     | 13                                          | 10.1    | 0.59     |
| Skull                | 6                             | 8.3     | 3                                           | 13.4    | 0.51     |
| Thoracic             | 11                            | 6.4     | 12                                          | 8.5     | 0.29     |
| Vertebrae            | 10                            | 9.5     | 12                                          | 9.0     | 0.86     |
| Nodal lesions        | 21                            | 11.4    | 6                                           | 9.7     | 0.95     |
| Prostate/bed         | 4                             | 4.8     | 3                                           | 9.2     | 0.11     |

\*SUV, standardized uptake value; wCV, within-subject coefficient of variation

†Visceral lesions were excluded from analysis due to their small number and only being present in the cohort imaged on the mCT
